The authors thank Geneviève Lucot and Djaid Robertson for their excellent technical assistance. The authors are grateful to Marie-Claude Froment for her secretarial work.

## REFERENCES

1. Gamulin Z, Forster A, Morel D, Simonet F, Aymon E, Favre H: Effects of infrarenal aortic cross-clamping on renal hemodynamics in humans. *ANESTHESIOLOGY* 61:394-399, 1984
2. Larson CP, Mazze RI, Cooperman LH, Wollman H: Effects of anesthetics on cerebral renal and splanchnic circulations. *ANESTHESIOLOGY* 41:169-181, 1974
3. Dunn MJ, Hood VL: Prostaglandins and the kidney. *Am J Physiol* 233: F169-F184, 1977
4. Margolius HS: The kallikrein-kinin system and the kidney. *Ann Rev Physiol* 46:309-326, 1984
5. Bevan DR: Renal Function in Anaesthesia and Surgery. New York, Grune & Stratton, 1979, pp 3-9
6. Diehl JT, Cali RF, Hertzner NR, Beven EG: Complications of abdominal aortic reconstruction. *Ann Surg* 197: 49-56, 1983
7. Favre H, Wauters JP, Mach RS: Advances in Nephrology, vol. I. Chicago, Year Book Medical Publishers, 1971, pp 195-205
8. Habig WH, Pabst MJ, Jakoby WB: The first enzymatic step in mercapturic acid formation. *J Biol Chem* 249:7130-7139, 1974
9. Reubi FC: Clearance Tests in Clinical Medicine. Springfield, Charles C. Thomas, 1963, pp 50-51
10. Feinfeld DA, Bourgoignie JJ, Fleischner G, Goldstein EJ, Biempica L, Arias IM: Ligandinuria in nephrotoxic acute tubular necrosis. *Kidney Int* 12: 387-392, 1977
11. Wugmeister M, Hehre FW: The absence of differential blockade in peridural anaesthesia. *Br J Anaesth* 39:953-956, 1967
12. Bonica JJ: Autonomic innervation of the viscera in relation to nerve block. *ANESTHESIOLOGY* 29:793-813, 1968
13. Berry AJ: Respiratory support and renal function. *ANESTHESIOLOGY* 55:655-667, 1981
14. Jarnberg PO, Eklund J, Granberg PO: Acute effects of furosemide and mannitol on renal function in the early postoperative period. *Acta Anaesthesiol Scand* 22:173-183, 1978
15. Stein M, James PM, Kelly J, Brown D, Shircliffe AC, Patterson WE: Renal protection during aortic cross-clamping. *Am Surg* 38:681-689, 1972
16. Johnston PA, Bernard DB, Donohoe JF, Perrin NS, Levinsky NC: Effect of volume expansion on hemodynamics of the hypoperfused rat kidney. *J Clin Invest* 64:550-558, 1979
17. Bidwai AV, Liu WS, Stanley TH, Bidwai V, Loeser EA, Shaw L: The effects of large doses of fentanyl and fentanyl with nitrous oxide on renal function in the dog. *Can Anaesth Soc J* 23:296-302, 1976
18. Pflug AE, Halter JB: Effect of spinal anesthesia on adrenergic tone and the neuroendocrine responses to surgical stress in humans. *ANESTHESIOLOGY* 55:120-126, 1981
19. Gal TJ, Cooperman LH, Berkowitz HD: Plasma renin activity in patients undergoing surgery of the abdominal aorta. *Ann Surg* 179:65-69, 1974
20. Grant RP, Jenkins LC: Modification by preoperative beta-blockade of the renin response to infrarenal aortic cross-clamping. *Can Anaesth Soc J* 30:480-486, 1983
21. Sivarajan M, Amory DW: Effect of total sympathetic blockade on plasma renin activity during surgery. *Can Anaesth Soc J* 27: 471-474, 1980
22. Vander AJ: Renal Physiology. New York, McGraw Hill, 1980, pp 59-67
23. Kennedy WF, Sawyer TK, Gerbershagen HU, Cutler RE, Allen GD, Bonica JJ: Systemic cardiovascular and renal hemodynamic alterations during peridural anesthesia in normal man. *ANESTHESIOLOGY* 31:414-421, 1969
24. Sivarajan M, Amory DW, Lindbloom LE: Systemic and regional blood flow during epidural anesthesia without epinephrine in the rhesus monkey. *ANESTHESIOLOGY* 45:300-310, 1976

Anesthesiology  
65:692-695, 1986

## Comparison of Direct Blood Pressure Measurements at the Radial and Dorsalis Pedis Arteries during Sodium Nitroprusside- and Isoflurane-induced Hypotension

MOUNIR ABOU-MADI, M.D.,\* SERGE LENIS, M.D.,† DAVID ARCHER, M.D.,‡  
PATRICK RAVUSSIN, M.D.,§ DAVY TROP, M.D.¶

Deliberate systemic hypotension can be induced by vasodilators (nitroprusside and nitroglycerin),<sup>1</sup> ganglionic blockers (trimethaphan),<sup>2</sup> and potent volatile anesthetics

(halothane and isoflurane).<sup>3</sup> A potential hazard of deliberate hypotension is cerebral ischemia.<sup>4</sup> Other organs susceptible to ischemic damage include the heart, gastrointestinal tract, and liver.<sup>5</sup> Hence arterial blood pressure is important to monitor during deliberate hypotension.

The most frequently used site for direct arterial blood pressure measurement is the radial artery (RA). Other sites, such as the dorsalis pedis artery (DPA), have been used.<sup>6</sup> Although differing pressures in RA and DPA may exist,<sup>7</sup> the influence of deliberate hypotension and drugs used to induce hypotension on this difference have not been clarified. We compared arterial blood pressure obtained from RA and DPA during deliberate hypotension

\* Associate Professor.

† Senior Resident.

‡ Assistant Professor.

§ Visiting Assistant Professor.

¶ Associate Professor and Director.

Received from the Department of Anesthesiology, Montreal Neurological Institute, McGill University, 3801 University Street, Montreal, Quebec, Canada H3A 2B4. Accepted for publication July 31, 1986.

Address reprint requests to Dr. Abou-Madi.

Key words: Anesthetic techniques: hypotension, induced. Arteries: dorsalis pedis; radial.

induced with either sodium nitroprusside (SNP) or high concentrations of isoflurane in patients undergoing clipping of an intracranial aneurysm.

# METHODS

Twenty ASA Class III patients (28–69 yr) scheduled for elective clipping of a cerebral aneurysm were randomly allocated to receive either intravenous ( $n = 10$ ) or isoflurane ( $n = 10$ ) anesthesia. Their age, weight, and sex distribution were similar (table 1). Their medication included epsilon-aminocaproic acid  $1 \text{ g} \cdot \text{h}^{-1}$  iv and phenobarbital 30–60 mg every 8 h by mouth. Patients with known intolerance to SNP were excluded. None of the patients suffered from peripheral vascular or cardiopulmonary disease. The study was approved by the Hospital Ethics Committee. All patients gave written informed consent to the study. Anesthesia was induced with fentanyl  $4 \mu\text{g} \cdot \text{kg}^{-1}$ , droperidol  $0.15 \text{ mg} \cdot \text{kg}^{-1}$ , and thiopental 3–5  $\text{mg} \cdot \text{kg}^{-1}$ , all given iv, followed by lidocaine  $1.5 \text{ mg} \cdot \text{kg}^{-1}$ , given to block the response to laryngoscopy and endotracheal intubation, which was facilitated with pancuronium  $0.1\text{--}0.15 \text{ mg} \cdot \text{kg}^{-1}$  iv. Ventilation was controlled using a circle system of 67% nitrous oxide in oxygen.  $\text{PaCO}_2$  was maintained at  $34 \pm 2 \text{ mmHg}$ . Additional pancuronium was administered to provide paralysis during the surgical procedure.

Patients allocated for intravenous anesthesia received incremental doses of fentanyl  $1.5 \mu\text{g} \cdot \text{kg}^{-1}$  throughout surgery. Thiopental (50–100 mg) was used if hemodynamic hyperactivity or signs of inadequate anesthesia could not be controlled by the earlier mentioned narcotic supplementation. In the other ten patients, anesthesia was maintained with supplemental 0.75–1.5% inspired concentration of isoflurane.

In all patients, 20-gauge Teflon® cannulae were inserted into the RA and DPA for direct pressure monitoring and blood sampling. To secure equal dynamic responses, both cannulae were connected by two identical arterial pressure tubings to the same pressure transducer<sup>8</sup> calibrated and placed at the level of the external auditory meatus. The pressure transducer was attached to three preamplifiers that continuously displayed systolic (SYST), diastolic (DIAST) and electronically obtained mean arterial pressure (MAP). Analysis of arterial blood gases was done at regular intervals.

In patients who received intravenous anesthesia, hypotension was achieved by SNP 50 mg in 500 ml of 5% glucose, given iv as a continuous infusion. The infusion rate was adjusted to achieve a radial MAP of 50–60 mmHg during the dissection and clipping of the aneurysmal sac.

In patients who received isoflurane anesthesia, the inspired isoflurane concentration was gradually increased until the same level of hypotension was achieved.

TABLE 1. Patient Characteristics

|             | Intravenous Anesthesia<br>(n = 10) | Isoflurane Anesthesia<br>(n = 10) |
|-------------|------------------------------------|-----------------------------------|
| Age (yr)    | 40.6 ± 12.6                        | 39.1 ± 10.4                       |
| Weight (kg) | 62.1 ± 7.6                         | 65.3 ± 6.8                        |
| Sex (F/M)   | 7/3                                | 7/3                               |

Data expressed as mean ± SD where applicable.

SYST, DIAST, and MAP were obtained from the two arteries in rapid succession (fig. 1) before, during, and 20 min after hypotension. A minimum of 5 min of stable arterial pressure was allowed before the measurements were taken.

The differences between RA and DPA values were analyzed using Student's *t* test. Probability values less than 0.5 were regarded as significant. Results are expressed as the mean ± SEM.

# RESULTS

With SNP-induced hypotension, the SYST, DIAST, and MAP were higher at the DPA than at the RA (fig. 2). This difference persisted throughout normotension, during hypotension, and on return to normotension; it was statistically significant during hypotension for SYST and MAP: RA SYST  $84.4 \pm 3.5 \text{ mmHg}$ , DPA SYST  $97.3 \pm 4.0 \text{ mmHg}$  ( $P < 0.05$ ); RA MAP  $57.7 \pm 1.8 \text{ mmHg}$ ; DPA MAP  $64.2 \pm 2.2 \text{ mmHg}$  ( $P < 0.05$ ); and post hypotension for SYST: RA SYST  $118.2 \pm 4.6 \text{ mmHg}$ , DPA SYST  $134.1 \pm 4.8 \text{ mmHg}$  ( $P < 0.05$ ). The mean SNP dose was  $2.1 \pm 0.4$  (SD)  $\mu\text{g} \cdot \text{kg}^{-1} \cdot \text{min}^{-1}$ , and the mean duration of hypotension was  $45 \pm 6$  (SD) min.

With isoflurane-induced hypotension, the SYST, DIAST, and MAP were higher at the RA than at the DPA. This difference lasted throughout the study and was statistically significant before hypotension for MAP: RA MAP  $84.2 \pm 2.1 \text{ mmHg}$ , DPA MAP  $77.3 \pm 2.3 \text{ mmHg}$  ( $P < 0.05$ ); and during hypotension for MAP: RA MAP  $58.7 \pm 1.2 \text{ mmHg}$ , DPA MAP  $54.3 \pm 1.2 \text{ mmHg}$  ( $P < 0.05$ ) (fig. 2). The mean duration of hypotension

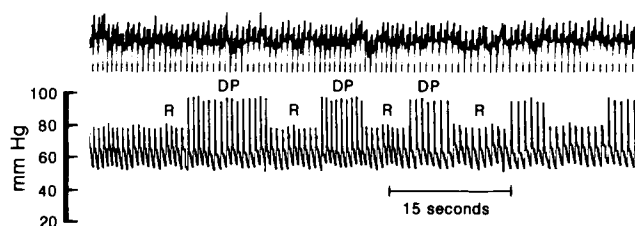

FIG. 1. Tracing demonstrating alternate pressures recordings from the radial (R) and dorsalis pedis (DP) arteries during nitroprusside-induced hypotension.

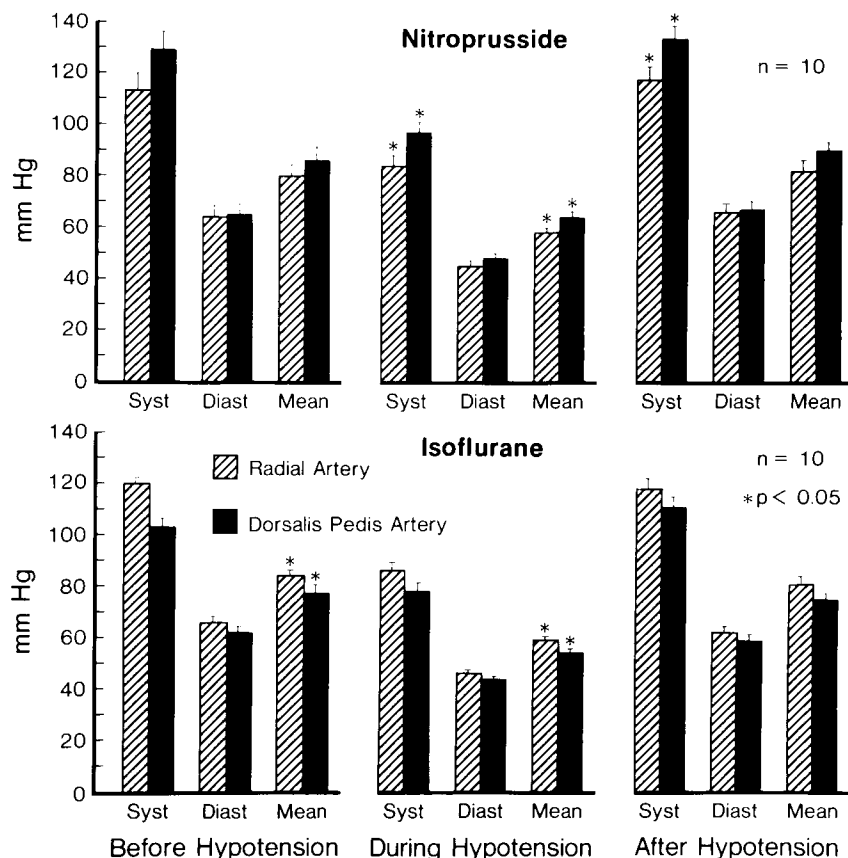

FIG. 2. Changes in systolic, diastolic, and mean arterial pressures at radial and dorsalis pedis arteries, before, during, and after nitroprusside- and isoflurane-induced hypotension. Values are mean  $\pm$  SEM. \* Significant difference between RA and DPA values ( $P < 0.05$ ).

was  $41 \pm 9$  (SD) min, which was obtained with an inspired isoflurane concentration of 2.0–2.5%.

### DISCUSSION

Our study demonstrated that isoflurane reverses the difference in pressures between the RA and DPA. Also, during hypotension the MAP measured at the RA differed significantly from that measured at the DPA. With SNP, the MAP at the DPA was significantly higher than at the RA and with isoflurane, the reverse was true. This would indicate that during SNP hypotension, the MAP might be excessively decreased when the arterial pressure is measured at the DPA, resulting in ischemic complications. Conversely, isoflurane-induced hypotension might yield low MAP readings at the DPA when the actual arterial pressure is higher than the acceptable lowest limit. This could be detrimental in cases where the lowest possible MAP is needed, as in a difficult aneurysm clipping.

The reason the MAP behaves differently during controlled hypotension with different hypotensive drugs remains to be elucidated. Johnstone and Greenhow<sup>9</sup> suggested that the DPA and the RA could be used interchangeably for invasive blood pressure monitoring. They

described differences between the RA and the DPA pressure curves, consisting of a larger pulse pressure with a higher systolic peak and a loss of the incisure when moving distally in the arterial tree. They attributed these changes to the increased impedance in the more peripheral arterial vasculature and to the reflections of previous waves at bifurcations. They also found that the systolic DPA pressure was 5–20 mmHg higher than the reference RA pressure.

Spoerel *et al.*<sup>10</sup> reported that by taking simultaneous measurements in humans, the systolic pressure and the pulse pressure were higher at the DPA than at the RA. In four patients, during normotension and controlled hypotension with trimethaphan, they found that the MAP was slightly higher at the RA than at the DPA but the differences were not significant. In view of a low incidence of complications in their series, they concluded that the DPA was an appropriate site to monitor arterial blood pressure when collateral flow was adequate. Youngberg and Miller<sup>6</sup> tried to evaluate the validity of DPA blood pressure measurements by comparing them with the blood pressure measured simultaneously with a cuff on the arm and concluded that the DPA was a good measuring site because measurements correlated well with the arm cuff

pressures. They also mentioned a low incidence of complications, consisting mainly of thrombosis of the cannulated artery, which they reported to be 6.7%.

Our results lead to different conclusions. The dissimilar behavior of the MAP observed in response to the two hypotensive agents probably results from the dissimilar effect of these two drugs on the vascular resistance of the arterial tree downstream of the measuring point. Miletich and Ivankovich<sup>11</sup> noted that while SNP has no effect on the myocardial muscle and does not change the cardiac output of the healthy heart, it reduces significantly the portion of the cardiac output delivered to the skin (0.08% to 0.05%,  $P < 0.05$ ), but maintains the blood flow to skeletal muscles. In contrast, Stevens *et al.*<sup>12</sup> found the skeletal muscle blood flow to increase by 199% at MAC 1 of isoflurane, and 227% at MAC 2; skin blood flow increased, up to 700%. Cardiac output was not appreciably changed.

The smaller vessels downstream from the RA and the DPA mainly supply skeletal muscles and skin. SNP may decrease blood flow distal to the measuring sites by increasing the distal impedance as a result of an increase in sympathetic response, as proposed by Miletich and Ivankovich.<sup>11</sup> This would preserve the systolic and pulse pressure amplification that is seen during normotension. Our results seem to confirm this hypothesis. Conversely, isoflurane diminishes the impedance distal to the measuring sites by decreasing the resistive component. This would then lower the pressure for a given flow and cancel the amplification effect previously described. Our results using isoflurane during normotension and hypotension agree with this explanation. Moreover, as the vascular bed distal to the DPA is larger than that distal to the RA, isoflurane would result in a larger drop of impedance at the DPA than at the RA and, hence, in a larger drop of the MAP at the DPA. Stern *et al.*<sup>13</sup> demonstrated a reversal of the usual relationship between aortic and RA pressure in patients immediately following cardiopulmonary bypass. They attributed their observation, in part, to vascular changes in the arm. Indeed, both systemic vascular resistance and forearm resistance were found to be low, implying vasodilation. Our results in patients who received isoflurane anesthesia may be explained on the same basis.

In conclusion, our results suggest that the DPA might not be an acceptable pressure measuring site during controlled hypotension, because it yields values that are at a variance from those recorded at the reference RA site, either higher or lower, depending on the mode of action

of the hypotensive drug used. These differences could become clinically important in some critical situations. Moreover, Husum *et al.*<sup>14</sup> found in their series a complication rate as high as 25% when all the cannulations of the DPA were routinely checked for possible thrombosis. This, allied with the finding of Spoerel *et al.*<sup>10</sup> that 16% of the population has inadequate collateral circulation in the foot, would actually make the DPA an undesirable site for cannulation.

## REFERENCES

1. Lagerkranser M, Gordon E, Rudehill A: Cardiovascular effects of sodium nitroprusside in cerebral aneurysm surgery. *Acta Anaesthesiol Scand* 24:426-432, 1980
2. Jordon WS, Graves CL, Boyd WA, Ueda I, Roberts TS: Cardiovascular effects of three techniques for inducing hypotension during anesthesia. *Anesth Analg* 50:1059-1068, 1971
3. Lam AM, Gelb AW: Cardiovascular effects of isoflurane-induced hypotension for cerebral aneurysm surgery. *Anesth Analg* 62: 742-748, 1983
4. Lindop MJ: Complications and morbidity of controlled hypotension. *Br J Anaesth* 47:799-803, 1975
5. Dong WK, Bledsoe SW, Eng DY, Heavner JE, Shaw C-M, Hornbein TF, Anderson JL: Profound arterial hypotension in dogs: Brain electrical activity and organ integrity. *ANESTHESIOLOGY* 58:61-71, 1983
6. Youngberg JA, Miller ED: Evaluation of percutaneous cannulations of the dorsalis pedis artery. *ANESTHESIOLOGY* 44:80-83, 1976
7. Bruner JMR: How the pressure pulse changes in traveling to the periphery, *Handbook of Blood Pressure Monitoring*. Edited by Bruner JMR. Littleton, MA, PSG Publishing Company, 1978, pp 58-62
8. Gardner RM: Direct blood pressure measurement: Dynamic response requirements. *ANESTHESIOLOGY* 54:227-236, 1981
9. Johnstone RE, Greenhow DE: Catheterization of the dorsalis pedis artery. *ANESTHESIOLOGY* 39:654-655, 1973
10. Spoerel WE, Deimling P, Aitken R: Direct arterial pressure monitoring from the dorsalis pedis artery. *Can Anaesth Soc J* 22: 91-99, 1975
11. Miletich DJ, Ivankovich AD: Sodium nitroprusside and cardiovascular hemodynamics, Nitroprusside and Other Short-acting Hypotensive Agents. Edited by Ivankovich AD. Boston, Little, Brown & Co, 1978, pp 31-49
12. Stevens WC, Cromwell TH, Halsey MJ: The cardiovascular effects of a new inhalation anesthetic, Forane, in human volunteers at constant arterial carbon dioxide tension. *ANESTHESIOLOGY* 35:8-16, 1971
13. Stern DH, Gerson JI, Allen FB, Parker FB: Can we trust the direct arterial pressure immediately following cardiopulmonary bypass? *ANESTHESIOLOGY* 62:557-561, 1985
14. Husum B, Palm T, Eriksen J: Percutaneous cannulation of the dorsalis pedis artery. A prospective study. *Br J Anaesth* 51: 1055-1058, 1979
